# Supplementary material for: Closed-loop recycling of plastics enabled by dynamic covalent diketoenamine bonds
Source: Springer Nature journal article supplement (doi:10.1038/s41557-019-0249-2), 2019-04-22
Supplement: 41557_2019_249_MOESM21_ESM.mol [file 41557_2019_249_MOESM21_ESM.mol]

nchem.18051011B-comp5.mol
  ChemDraw03041912312D

 23 24  0  0  0  0  0  0  0  0999 V2000
   -2.4454   -1.2928    0.0000 C   0  0  0  0  0  0  0  0  0  0  0  0
   -2.4454   -2.1178    0.0000 C   0  0  0  0  0  0  0  0  0  0  0  0
   -1.7309   -2.5303    0.0000 C   0  0  0  0  0  0  0  0  0  0  0  0
   -1.0164   -2.1178    0.0000 C   0  0  0  0  0  0  0  0  0  0  0  0
   -1.0164   -1.2928    0.0000 C   0  0  0  0  0  0  0  0  0  0  0  0
   -1.7309   -0.8803    0.0000 C   0  0  0  0  0  0  0  0  0  0  0  0
   -1.7309   -0.0553    0.0000 O   0  0  0  0  0  0  0  0  0  0  0  0
   -0.3020   -2.5303    0.0000 O   0  0  0  0  0  0  0  0  0  0  0  0
   -3.2704   -2.1178    0.0000 C   0  0  0  0  0  0  0  0  0  0  0  0
   -2.8579   -2.8322    0.0000 C   0  0  0  0  0  0  0  0  0  0  0  0
   -0.3020   -0.8803    0.0000 C   0  0  0  0  0  0  0  0  0  0  0  0
   -0.3020   -0.0553    0.0000 N   0  0  0  0  0  0  0  0  0  0  0  0
    0.4125   -1.2928    0.0000 C   0  0  0  0  0  0  0  0  0  0  0  0
    0.4125    0.3572    0.0000 C   0  0  0  0  0  0  0  0  0  0  0  0
    1.1270   -0.0553    0.0000 C   0  0  0  0  0  0  0  0  0  0  0  0
    1.8414    0.3572    0.0000 C   0  0  0  0  0  0  0  0  0  0  0  0
    1.8414    1.1822    0.0000 C   0  0  0  0  0  0  0  0  0  0  0  0
    1.1270    1.5947    0.0000 C   0  0  0  0  0  0  0  0  0  0  0  0
    0.4125    1.1822    0.0000 C   0  0  0  0  0  0  0  0  0  0  0  0
    2.5559    1.5947    0.0000 O   0  0  0  0  0  0  0  0  0  0  0  0
    2.5559    2.4197    0.0000 C   0  0  0  0  0  0  0  0  0  0  0  0
    3.2704    2.8322    0.0000 C   0  0  0  0  0  0  0  0  0  0  0  0
   -1.0197    0.3591    0.0000 H   0  0  0  0  0  0  0  0  0  0  0  0
  1  2  1  0      
  2  3  1  0      
  3  4  1  0      
  4  5  1  0      
  5  6  1  0      
  6  1  1  0      
  6  7  2  0      
  4  8  2  0      
  2  9  1  0      
  2 10  1  0      
  5 11  2  0      
 11 12  1  0      
 11 13  1  0      
 12 14  1  0      
 14 15  2  0      
 15 16  1  0      
 16 17  2  0      
 17 18  1  0      
 18 19  2  0      
 19 14  1  0      
 17 20  1  0      
 20 21  1  0      
 21 22  1  0      
 12 23  1  0      
M  END
